# Supplementary material for: Brain gene expression analyses in virgin and mated queens of fire ants reveal mating‐independent and socially regulated changes
Source: PubMed Central journal article supplement (PMC5916306; doi:10.1002/ece3.3976), 2018-04-02
Supplement: ECE3-8-4312-s001.pdf [file ECE3-8-4312-s001.pdf]

## Supplementary Information

### Supplementary Table 1. Primers utilized for qRT-PCR analyses

| GOI              | Accession number | Forward primer<br>5'-3' | Reverse Primer<br>5'-3' | Product<br>(bp) |
|------------------|------------------|-------------------------|-------------------------|-----------------|
| Hexamerin-like   | XM_011157206     | GGGTGTTACGGTTCGAATCTG   | TGAGCCTCCTTGTGACTGTG    | 108             |
| Astakine-like    | XM_011167741     | ACGGATTATCCTGCGATTTC    | CCGACTAGGTTCCACATAATCC  | 104             |
| Noncoding RNA    | XR_850725        | CGATGATTTCTGCTCACGTC    | ATCACCTTCGCCAAACATTC    | 103             |
| Noncoding RNA    | XR_850909        | TGCAACCCAAACCACACTAA    | TGATTGCCATGATTGTCAAGA   | 92              |
| Elf1-Beta        | XM_011169118     | TCGCCAAGTCAAGTATCGTG    | CCAAACAAGACCGTCCATTT    | 107             |
| RPL18            | XM_011165253     | TACACCGACCACCGATTCA     | GATCACGGCGACGCAATT      | 80              |
| Hexamerin 2      | XM_011173560     | CGTAGGATATGGACCGTTG     | GCCTTGATGTTGGATTGCT     | 97              |
| Arylphorin-Alpha | XM_011157183     | GCCCTTTCCGTAGAGAGCTT    | TGTTGACGTTGAAGCGGTAG    | 103             |
| Arylphorin-Beta  | XM_011157182     | GCCGACTACAACACCATCAA    | CGAAGGATTCACCAGAGAGG    | 108             |

### Supplementary Table S2. Libraries statistics: number of reads mapping to the *Solenopsis invicta* genome for each replicate (Rep.).

|      | Alate queen brain |                     | Mated queen brain |                     |
|------|-------------------|---------------------|-------------------|---------------------|
|      | input             | Mapped (% of input) | input             | Mapped (% of input) |
| Rep1 | 13,665,083        | 12,464,405 (91.2)   | 17,305,195        | 16,128,864 (93.2)   |
| Rep2 | 13,486,050        | 12,336,327 (91.5)   | 16,015,749        | 14,846,343 (92.7)   |
| Rep3 | 14,717,332        | 13,368,742 (90.8)   | 18,335,231        | 17,143,926 (93.5)   |
| Rep4 | 15,669,271        | 14,294,871 (91.2)   | 16,561,818        | 15,459,348 (93.3)   |

### Supplementary Table 3: GPCRs expressed in virgin alate queen brain or mated dealate queen brain transcriptomes. GPCRs are annotated as currently identified in the *Solenopsis invicta* transcriptome and organized from highest to lowest average FPKM.

| GeneInfo Identifier | Protein Accession | Transcript Accession | Locus        | Current annotation                        | Alate FPKM | Mated FPKM |
|---------------------|-------------------|----------------------|--------------|-------------------------------------------|------------|------------|
| gi 751222462        | XP_011164467.1    | XM_011166165         | LOC105199190 | rhodopsin                                 | 122.76     | 322.869    |
| gi 751202946        | XP_011174320.1    | XM_011176018         | LOC105206526 | dopamine receptor 1                       | 77.9886    | 133.694    |
| gi 751222464        | XP_011164468.1    | XM_011166166         | LOC105199191 | rhodopsin-like                            | 91.2739    | 77.2333    |
| gi 751236330        | XP_011171996.1    | XM_011173694         | LOC105204568 | PDF receptor                              | 25.2926    | 51.0937    |
| gi 751222675        | XP_011164585.1    | XM_011166283         | LOC105199276 | probable G-protein coupled receptor AH9.1 | 28.8151    | 35.6691    |

|              |                |              |              |                                                        |         |         |
|--------------|----------------|--------------|--------------|--------------------------------------------------------|---------|---------|
| gi 751209716 | XP_011157518.1 | XM_011159216 | LOC105194339 | probable G-protein coupled receptor 52                 | 25.6449 | 34.8058 |
| gi 751223066 | XP_011164802.1 | XM_011166501 | LOC105199400 | muscarinic acetylcholine receptor DM1 isoform X1       | 23.8323 | 28.1483 |
| gi 751205599 | XP_011176389.1 | XM_011178087 | LOC105208274 | tachykinin-like peptides receptor 99D, partial         | 17.3657 | 32.4827 |
| gi 751223401 | XP_011164985.1 | XM_011166683 | LOC105199537 | opsin, ultraviolet-sensitive-like                      | 37.043  | 12.2558 |
| gi 751238153 | XP_011173009.1 | XM_011174707 | LOC105205353 | dopamine receptor 2-like                               | 22.8932 | 21.386  |
| gi 751212977 | XP_011159291.1 | XM_011160989 | LOC105195542 | PREDICTED: G-protein coupled receptor moody isoform X2 | 17.3692 | 20.2122 |
| gi 751212975 | XP_011159290.1 | XM_011160988 | LOC105195542 | PREDICTED: G-protein coupled receptor moody isoform X1 | 20.1014 | 14.7491 |
| gi 751232987 | XP_011170144.1 | XM_011171842 | LOC105203085 | tachykinin-like peptides receptor 99D                  | 12.7003 | 18.8504 |
| gi 751223068 | XP_011164803.1 | XM_011166500 | LOC105199400 | muscarinic acetylcholine receptor DM1 isoform X2       | 14.0267 | 11.4862 |
| gi 751233286 | XP_011170315.1 | XM_011172013 | LOC105203239 | allatostatin-A receptor-like isoform X1                | 13.6399 | 11.547  |
| gi 751219449 | XP_011162809.1 | XM_011164507 | LOC105197902 | calcitonin receptor-like                               | 12.5495 | 12.6063 |
| gi 751210001 | XP_011157676.1 | XM_011159374 | LOC105194460 | diuretic hormone receptor-like                         | 13.131  | 11.574  |
| gi 751222422 | XP_011164446.1 | XM_011166144 | LOC105199174 | 5-hydroxytryptamine receptor 2A-like isoform X1        | 14.5434 | 10.0597 |
| gi 751207421 | XP_011156273.1 | XM_011157971 | LOC105193512 | tyramine receptor 1                                    | 9.84056 | 12.2824 |

|              |                |              |              |                                                         |         |         |
|--------------|----------------|--------------|--------------|---------------------------------------------------------|---------|---------|
| gi 751223477 | XP_011165026.1 | XM_011166724 | LOC105199572 | 5-hydroxytryptamine receptor 2B-like                    | 6.77122 | 14.5504 |
| gi 751231536 | XP_011169333.1 | XM_011171031 | LOC105202476 | octopamine receptor beta-1R-like                        | 12.9282 | 6.29347 |
| gi 751205401 | XP_011176282.1 | XM_011177980 | LOC105208194 | uncharacterized protein LOC105208194                    | 9.47505 | 9.49876 |
| gi 751211218 | XP_011158340.1 | XM_011160038 | LOC105194900 | 5-hydroxytryptamine receptor 2A-like                    | 7.82188 | 10.8045 |
| gi 751206701 | XP_011155882.1 | XM_011157580 | LOC105193213 | latrophilin Cirl-like                                   | 8.47064 | 8.25634 |
| gi 751237973 | XP_011172906.1 | XM_011174604 | LOC105205262 | probable muscarinic acetylcholine receptor gar-1        | 6.71836 | 9.72939 |
| gi 751230013 | XP_011168496.1 | XM_011170194 | LOC105201914 | alpha-1A adrenergic receptor-like                       | 9.25873 | 6.82297 |
| gi 751201048 | XP_011165260.1 | XM_011166958 | LOC105199739 | probable G-protein coupled receptor No9                 | 6.04333 | 8.33983 |
| gi 751208599 | XP_011156916.1 | XM_011158614 | LOC105193922 | tachykinin-like peptides receptor 86C, partial          | 6.81062 | 7.03414 |
| gi 751218298 | XP_011162177.1 | XM_011163875 | LOC105197486 | gastrin/cholecystokinin type B receptor-like isoform X2 | 6.27368 | 6.64    |
| gi 751199635 | XP_011157701.1 | XM_011159399 | LOC105194469 | tyramine receptor 1-like                                | 6.55474 | 6.09929 |
| gi 751212247 | XP_011158889.1 | XM_011160587 | LOC105195234 | neuropeptides capa receptor-like                        | 6.25855 | 6.23513 |
| gi 751207849 | XP_011156508.1 | XM_011158206 | LOC105193663 | histamine H2 receptor isoform X2                        | 3.49217 | 8.65461 |

|              |                |              |              |                                                |         |         |
|--------------|----------------|--------------|--------------|------------------------------------------------|---------|---------|
| gi 751201367 | XP_011167017.1 | XM_011168715 | LOC105200910 | opsin, blue-sensitive                          | 5.64833 | 6.20141 |
| gi 751211271 | XP_011158366.1 | XM_011160064 | LOC105194927 | dopamine D2-like receptor                      | 4.67986 | 6.46566 |
| gi 751230111 | XP_011168550.1 | XM_011170248 | LOC105201947 | adenosine receptor A2b-like isoform X1         | 5.87984 | 4.76843 |
| gi 751204439 | XP_011175773.1 | XM_011167349 | LOC105200002 | neuromedin-U receptor 2-like                   | 5.06395 | 5.44275 |
| gi 751224601 | XP_011165651.1 | XM_011167349 | LOC105200002 | neuromedin-U receptor 2-like                   | 5.06395 | 5.44275 |
| gi 751214247 | XP_011159970.1 | XM_011161668 | LOC105195979 | FMRFamide receptor isoform X2                  | 3.61381 | 6.12039 |
| gi 751236000 | XP_011171810.1 | XM_011173508 | LOC105204438 | uncharacterized protein LOC105204438           | 3.49725 | 6.16527 |
| gi 751233288 | XP_011170316.1 | XM_011172014 | LOC105203239 | allatostatin-A receptor-like isoform X1        | 5.06126 | 4.10991 |
| gi 751218178 | XP_011162112.1 | XM_011163810 | LOC105197452 | orexin receptor type 1-like                    | 3.81174 | 5.29119 |
| gi 751238033 | XP_011172940.1 | XM_011174638 | LOC105205294 | tachykinin-like peptides receptor 86C, partial | 4.35839 | 3.83249 |
| gi 751206733 | XP_011155898.1 | XM_011157596 | LOC105193226 | trace amine-associated receptor 9              | 4.70743 | 3.4473  |
| gi 751224717 | XP_011165717.1 | XM_011167415 | LOC105200046 | gastrin-releasing peptide receptor-like        | 3.32243 | 4.03507 |
| gi 751205799 | XP_011155394.1 | XM_011157092 | LOC105192838 | cholecystokinin receptor-like                  | 3.71336 | 3.47172 |
| gi 751225754 | XP_011166274.1 | XM_011167972 | LOC105200419 | octopamine receptor beta-2R isoform X1         | 2.99628 | 3.91515 |
| gi 751217754 | XP_011161886.1 | XM_011163584 | LOC105197287 | octopamine receptor beta-3R-like               | 2.60488 | 3.37885 |

|              |                |              |              |                                                       |         |         |
|--------------|----------------|--------------|--------------|-------------------------------------------------------|---------|---------|
| gi 751202675 | XP_011173067.1 | XM_011174765 | LOC105205389 | gonadotropin-releasing hormone II receptor isoform X2 | 1.65061 | 4.11409 |
| gi 751207336 | XP_011156229.1 | XM_011157927 | LOC105193474 | octopamine receptor beta-3R-like                      | 2.15744 | 3.39361 |
| gi 751220611 | XP_011163444.1 | XM_011165142 | LOC105198435 | FMRFamide receptor-like                               | 3.1209  | 2.29737 |
| gi 751232028 | XP_011169609.1 | XM_011171307 | LOC105202687 | neuropeptide FF receptor 2                            | 1.93127 | 2.68557 |
| gi 751206248 | XP_011155636.1 | XM_011157334 | LOC105193015 | protocadherin-like wing polarity protein stan         | 1.99164 | 2.43573 |
| gi 751224894 | XP_011165811.1 | XM_011167509 | LOC105200112 | growth hormone secretagogue receptor type 1           | 2.2874  | 1.8629  |
| gi 751208123 | XP_011156656.1 | XM_011158354 | LOC105193776 | lutropin-choriogonadotropic hormone receptor          | 2.1355  | 1.84212 |
| gi 751212866 | XP_011159228.1 | XM_011160926 | LOC105195500 | prolactin-releasing peptide receptor-like             | 1.74498 | 2.1542  |
| gi 751214243 | XP_011159967.1 | XM_011161665 | LOC105195979 | FMRFamide receptor isoform X1                         | 2.22963 | 1.61088 |
| gi 751225756 | XP_011166275.1 | XM_011167973 | LOC105200419 | octopamine receptor beta-2R isoform X2                | 2.15962 | 1.58662 |
| gi 751224703 | XP_011165709.1 | XM_011167407 | LOC105200038 | LOW QUALITY PROTEIN: neuromedin-B receptor-like       | 2.19548 | 1.50736 |
| gi 751236288 | XP_011171973.1 | XM_011173671 | LOC105204554 | secretin receptor-like isoform X2                     | 1.80764 | 1.47041 |
| gi 751205399 | XP_011176281.1 | XM_011177978 | LOC105208194 | uncharacterized protein LOC105208194                  | 1.74897 | 1.40877 |

|              |                |              |              |                                                       |          |          |
|--------------|----------------|--------------|--------------|-------------------------------------------------------|----------|----------|
| gi 751204377 | XP_011175739.1 | XM_011177437 | LOC105207791 | neuropeptides capa receptor-like                      | 1.38895  | 1.70664  |
| gi 751199398 | XP_011156359.1 | XM_011158057 | LOC105193552 | prostaglandin E2 receptor EP3 subtype                 | 1.73066  | 1.25177  |
| gi 751202673 | XP_011173059.1 | XM_011174757 | LOC105205389 | gonadotropin-releasing hormone II receptor isoform X1 | 1.0036   | 1.87529  |
| gi 751210368 | XP_011157876.1 | XM_011159574 | LOC105194591 | allatostatin-A receptor-like                          | 1.52128  | 1.32521  |
| gi 751217576 | XP_011161788.1 | XM_011163486 | LOC105197213 | neuropeptides capa receptor-like isoform X2           | 1.63435  | 1.16905  |
| gi 751202512 | XP_011172409.1 | XM_011174107 | LOC105204861 | allatostatin-A receptor                               | 1.59364  | 1.14899  |
| gi 751205345 | XP_011176251.1 | XM_011177949 | LOC105208166 | protein trapped in endoderm-1                         | 1.51694  | 1.10737  |
| gi 751222424 | XP_011164447.1 | XM_011166145 | LOC105199174 | 5-hydroxytryptamine receptor 2A-like isoform X2       | 0.000951 | 2.46655  |
| gi 751234791 | XP_011171145.1 | XM_011172843 | LOC105203919 | uncharacterized protein LOC105203919                  | 1.27474  | 1.18695  |
| gi 751212979 | XP_011159292.1 | XM_011160990 | LOC105195543 | G-protein coupled receptor moody                      | 1.24731  | 1.17934  |
| gi 751212250 | XP_011158890.1 | XM_011160588 | LOC105195236 | neuropeptides capa receptor-like                      | 1.88112  | 0.468675 |
| gi 751212870 | XP_011159230.1 | XM_011160929 | LOC105195500 | prolactin-releasing peptide receptor-like             | 0.676592 | 1.60495  |
| gi 751236286 | XP_011171972.1 | XM_011173670 | LOC105204554 | secretin receptor-like isoform X1                     | 0.805082 | 1.36281  |
| gi 751199777 | XP_011158500.1 | XM_011160198 | LOC105195005 | relaxin receptor 1                                    | 1.34767  | 0.788181 |

|              |                |              |              |                                                                                              |          |          |
|--------------|----------------|--------------|--------------|----------------------------------------------------------------------------------------------|----------|----------|
| gi 751221554 | XP_011163962.1 | XM_011165660 | LOC105198818 | alpha-2A adrenergic receptor                                                                 | 0.988972 | 1.14645  |
|              |                | XR_850821    | LOC105197486 | gastrin/cholecystokinin type B receptor-like (LOC105197486), transcript variant X2, misc_RNA | 0.130718 | 1.98553  |
| gi 751236292 | XP_011171975.1 | XM_011173673 | LOC105204554 | secretin receptor-like isoform X4                                                            | 0.991241 | 1.06065  |
| gi 751236290 | XP_011171974.1 | XM_011173672 | LOC105204554 | secretin receptor-like isoform X3                                                            | 1.58782  | 0.348021 |
| gi 751204965 | XP_011176051.1 | XM_011177749 | LOC105208023 | green-sensitive opsin-like                                                                   | 0.330279 | 1.35461  |
| gi 751212868 | XP_011159229.1 | XM_011160928 | LOC105195500 | prolactin-releasing peptide receptor-like                                                    | 1.67119  | 0.00067  |
| gi 751203152 | XP_011175066.1 | XM_011176764 | LOC105207336 | cardioacceleratory peptide receptor-like                                                     | 0.592684 | 0.971376 |
| gi 751236282 | XP_011171969.1 | XM_011173667 | LOC105204554 | secretin receptor-like isoform X1                                                            | 0.597832 | 0.886539 |
| gi 751212872 | XP_011159231.1 | XM_011160927 | LOC105195500 | prolactin-releasing peptide receptor-like                                                    | 0.000375 | 1.4159   |
| gi 751214494 | XP_011160104.1 | XM_011161802 | LOC105196073 | LOW QUALITY PROTEIN: probable G-protein coupled receptor B0563.6                             | 0.529527 | 0.875558 |
| gi 751209558 | XP_011157431.1 | XM_011159129 | LOC105194275 | gonadotropin-releasing hormone receptor-like                                                 | 0.330771 | 0.972118 |
| gi 751224902 | XP_011165816.1 | XM_011167514 | LOC105200117 | thyrotropin-releasing hormone receptor-like                                                  | 0.349814 | 0.849813 |

|              |                |              |              |                                                         |          |          |
|--------------|----------------|--------------|--------------|---------------------------------------------------------|----------|----------|
| gi 751236194 | XP_011171921.1 | XM_011173619 | LOC105204531 | G-protein coupled receptor Mth2-like                    | 0.508774 | 0.580146 |
| gi 751228090 | XP_011167439.1 | XM_011169137 | LOC105201199 | adenosine receptor A2b-like                             | 0.391874 | 0.666697 |
| gi 751236294 | XP_011171976.1 | XM_011173674 | LOC105204554 | secretin receptor-like isoform X5                       | 0.545303 | 0.399329 |
| gi 751228088 | XP_011167438.1 | XM_011169136 | LOC105201199 | adenosine receptor A2b-like                             | 0.381256 | 0.409619 |
| gi 751232585 | XP_011169919.1 | XM_011171617 | LOC105202925 | 5-hydroxytryptamine receptor 1-like                     | 0.222941 | 0.555203 |
| gi 751218295 | XP_011162176.1 | XM_011163874 | LOC105197486 | gastrin/cholecystokinin type B receptor-like isoform X1 | 0.34228  | 0.164363 |
| gi 751236280 | XP_011171968.1 | XM_011173666 | LOC105204554 | secretin receptor-like isoform X1                       | 0        | 0.484745 |
| gi 751234850 | XP_011171180.1 | XM_011172878 | LOC105203942 | gonadotropin-releasing hormone receptor-like, partial   | 0.456537 | 0        |
| gi 751225429 | XP_011166100.1 | XM_011167798 | LOC105200319 | probable G-protein coupled receptor Mth-like 2          | 0.21404  | 0.034813 |
| gi 751205397 | XP_011176280.1 | XM_011177979 | LOC105208194 | uncharacterized protein LOC105208194                    | 0.171619 | 0        |
| gi 751225427 | XP_011166099.1 | XM_011167797 | LOC105200318 | uncharacterized protein LOC105200318                    | 0.036088 | 0.068215 |
| gi 751225752 | XP_011166273.1 | XM_011167971 | LOC105200419 | octopamine receptor beta-2R isoform X1                  | 0.002057 | 0.098628 |
| gi 751214816 | XP_011160284.1 | XM_011161982 | LOC105196189 | uncharacterized protein LOC105196189                    | 0        | 0.098093 |



|              |                |              |              |                                                 |          |          |
|--------------|----------------|--------------|--------------|-------------------------------------------------|----------|----------|
| gi 751213593 | XP_011159613.1 | XM_011161311 | LOC105195745 | vasopressin V1a receptor-like isoform X2        | 0.075512 | 0        |
| gi 751213591 | XP_011159612.1 | XM_011161310 | LOC105195745 | vasopressin V1a receptor-like isoform X1        | 0        | 0.033531 |
| gi 751203577 | XP_011175311.1 | XM_011177009 | LOC105207504 | uncharacterized protein LOC105207504 isoform X4 | 0        | 0.027589 |
| gi 751205347 | XP_011176253.1 | XM_011177951 | LOC105208166 | protein trapped in endoderm-1                   | 0.002619 | 0.000177 |
| gi 751207847 | XP_011156507.1 | XM_011158205 | LOC105193663 | histamine H2 receptor isoform X1                | 0        | 0.002322 |
| gi 751199633 | XP_011157692.1 | XM_011159390 | LOC105194469 | tyramine receptor 1-like                        | 0.0005   | 0.001214 |
| gi 751230113 | XP_011168551.1 | XM_011170249 | LOC105201947 | adenosine receptor A2b-like isoform X2          | 0.000606 | 0.000314 |
| gi 751214241 | XP_011159966.1 | XM_011161664 | LOC105195979 | FMRFamide receptor isoform X1                   | 0.000179 | 0        |
| gi 751217574 | XP_011161787.1 | XM_011163485 | LOC105197213 | neuropeptides capa receptor-like isoform X1     | 3.14E-05 | 8.00E-05 |
| gi 751236196 | XP_011171922.1 | XM_011173620 | LOC105204531 | G-protein coupled receptor Mth2-like            | 7.72E-05 | 2.01E-05 |
| gi 751209556 | XP_011157430.1 | XM_011159128 | LOC105194275 | gonadotropin-releasing hormone receptor-like    | 6.94E-06 | 0        |
| gi 751203575 | XP_011175310.1 | XM_011177008 | LOC105207504 | G-protein coupled receptor Mth2-like isoform X3 | 0        | 4.18E-06 |
| gi 751203573 | XP_011175309.1 | XM_011177007 | LOC105207504 | uncharacterized protein LOC105207504 isoform X2 | 0        | 2.33E-06 |

|              |                |              |              |                                                       |   |          |
|--------------|----------------|--------------|--------------|-------------------------------------------------------|---|----------|
| gi 751203571 | XP_011175308.1 | XM_011177006 | LOC105207504 | G-protein coupled receptor Mth2-like isoform X1       | 0 | 5.29E-07 |
| gi 751203569 | XP_011175307.1 | XM_011177005 | LOC105207504 | G-protein coupled receptor Mth2-like isoform X1       | 0 | 4.22E-07 |
| gi 751209550 | XP_011157427.1 | XM_011159125 | LOC105194275 | gonadotropin-releasing hormone receptor-like          | 0 | 0        |
| gi 751209552 | XP_011157428.1 | XM_011159126 | LOC105194275 | gonadotropin-releasing hormone receptor-like          | 0 | 0        |
| gi 751209554 | XP_011157429.1 | XM_011159127 | LOC105194275 | gonadotropin-releasing hormone receptor-like          | 0 | 0        |
| gi 751217578 | XP_011161789.1 | XM_011163487 | LOC105197213 | neuropeptides capa receptor-like isoform X3           | 0 | 0        |
| gi 751202671 | XP_011173053.1 | XM_011174751 | LOC105205389 | gonadotropin-releasing hormone II receptor isoform X1 | 0 | 0        |
| gi 751214245 | XP_011159968.1 | XM_011161666 | LOC105195979 | FMRFamide receptor isoform X1                         | 0 | 0        |
| gi 751236274 | XP_011171965.1 | XM_011173663 | LOC105204554 | secretin receptor-like isoform X1                     | 0 | 0        |
| gi 751236276 | XP_011171966.1 | XM_011173664 | LOC105204554 | secretin receptor-like isoform X1                     | 0 | 0        |
| gi 751236278 | XP_011171967.1 | XM_011173665 | LOC105204554 | secretin receptor-like isoform X1                     | 0 | 0        |

|              |                |              |              |                                               |   |   |
|--------------|----------------|--------------|--------------|-----------------------------------------------|---|---|
| gi 751236284 | XP_011171971.1 | XM_011173669 | LOC105204554 | secretin receptor-like isoform X1             | 0 | 0 |
| gi 751206087 | XP_011155552.1 | XM_011157250 | LOC105192960 | gonadotropin-releasing hormone receptor-like  | 0 | 0 |
| gi 751239722 | XP_011173862.1 | XM_011175560 | LOC105206029 | glucagon receptor-like, partial               | 0 | 0 |
| gi 751227496 | XP_011167228.1 | XM_011168926 | LOC105201068 | uncharacterized protein LOC105201068, partial | 0 | 0 |
| gi 751219652 | XP_011162921.1 | XM_011164619 | LOC105197996 | uncharacterized protein LOC105197996          | 0 | 0 |
| gi 751234416 | XP_011170936.1 | XM_011172634 | LOC105203747 | somatostatin receptor type 2-like             |   |   |

**Supplementary methods. Analyses of hexamerins expression in the head and thorax/abdomen of queens**

For comparisons of gene expression of four different hexamerins between head and thorax plus abdomen (Fig. S2), alate virgin queens were decapitated with fine forceps. Ten queens were used per independent replicate immediately placing either heads or thorax/abdomens into 100  $\mu$ L Trizol on ice. Samples were stored at  $-80^{\circ}\text{C}$  overnight and thawed on ice. Tissues were homogenized in microcentrifuge tubes using sterile plastic pestles (Thermo Fisher Scientific), after which RNA was extracted and cDNA was synthesized as described.

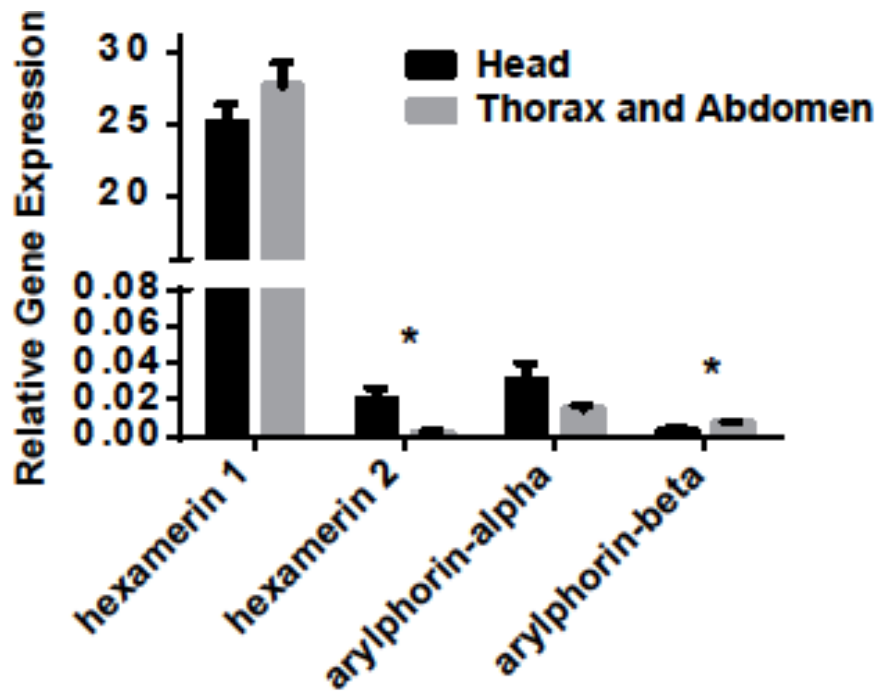

**Supplemental Figure 1: Expression of hexamerins in virgin alate queen heads and thorax/ abdomens.** Gene expression determined by qPCR was normalized to both Elf1-Beta and RPL18. Bars indicate mean relative gene expression ( $\Delta\text{Ct}$ )  $\pm$  SEM,  $n = 4$ . “\*” indicate a significant difference ( $p \leq 0.05$ ) for the examined corresponding hexamerins between heads and thorax/abdomen, as determined by  $t$ -tests. Hexamerin 1,  $p = 0.2590$ ; Hexamerin 2,  $p = 0.0226$ ; Arylphorin-alpha,  $p = 0.1707$ ; Arylphorin-beta,  $p = 0.0254$ .
